# Supplementary material
Source: Elsevier journal article supplement (http://www.mmc-center.com/pdf/mmc51.pdf)
Supplement: mmc51 [file mmc51.pdf]

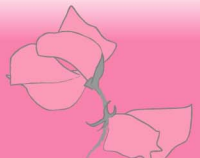

February Flower  
すいーとびー門出 繊細な喜び

三重県の卒後研修と地域医療を支えます。

## 第6回MMC卒後研修臨床懇話会

去る年1月30日(土)、ホテルグリーンパーク津にて、第6回MMC卒後研修臨床懇話会が開催された。三重県の臨床研修の充実、地域医療の充実のほか、研修医自身の交流、モチベーションの喚起にもつなげたいと考えて6回目となった。研修医によっては初めての症例発表の方もあり、緊張した面持ちの中、日頃の臨床研修の成果がうかがえる爽やかな発表となった。会場からは指導医はもちろん、研修医からも活発な意見交換が行われた。発表終了後は2006年度クイーン四日市のタレント、中津友里さんの司会で懇親会と表彰式が行われた。竹田MMC理事長から挨拶を受け、古元三重県医療政策監による乾杯、そして、庄村山田赤十字病院副院長よりそれぞれの研修医に賞状と副賞(商品券)が授与され、優勝者には持ち回りのトロフィーが伝達された。

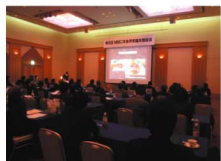

●参加者74名、演題24題が発表された会場内

### ■1年次の部

- 優 勝…三木裕介 先生(市立四日市病院)  
小腸穿孔にて発症したT細胞性悪性リンパ腫の1例
- 準優勝…山田将護 先生(松阪市民病院)  
EGFR遺伝子変異(-)にも関わらずエルロロチニブが奏功した2例
- 三 位…鎌谷真衣 先生(鈴鹿中央総合病院)  
術後せん妄予防にデクスメトミジンを使用した1例
- 最優秀指導医…鎗田哲暢 先生(市立四日市病院)

### ■2年次の部

- 優 勝…北嶋貴仁 先生(三重大学医学部附属病院)  
開腹所見にて診断を確定し得たコレステロール結核の1例
- 準優勝…金子俊 先生(紀南病院)  
紀南病院での地域医療研修～自分と指導医のルーツを訪ねて～
- 三 位…島村涌子 先生(市立四日市病院)  
CVポート感染関連菌血症に起因する椎間板炎の加療と併せ経腸栄養移行をなし得た短腸症候群の1例  
…野口晴加 先生(山田赤十字病院)  
救急外来で経験したマムシ咬傷の1例
- 最優秀指導医…村田智博 先生(三重大学医学部附属病院)

## 第6回MMC卒後研修臨床懇話会 第10回MMC指導医講習会/ 第5回名大ネットワーク指導医講習会 (伊勢志摩会場) 第1回MMC実行委員会

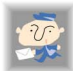

### ■情報コーナー

- 三重県研修病院合同説明会開催 (第二報)
- 第2回 研修医Advanced OSCE大会(第7回MMCAdvanced OSCE大会)
- 平成22年度新採用研修医オリエンテーション(速報)
- 平成22年度 MMC輸液セミナー日程決定
- 三重県の地域医療を考える

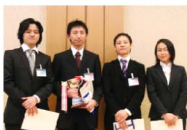

●1年次

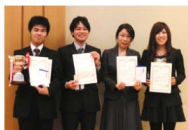

●2年次

## 第10回MMC指導医講習会/ 第5回名大ネットワーク指導医講習会 (伊勢志摩会場)

ホテル近鉄アクアヴィラ伊勢志摩にて、MMC26名を含む47名のドクターは新年明け早々の1月21日(木)から23日(土)までの2泊3日、ワークショップを行い、「臨床研修指導医」修了証書を受けた。

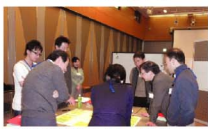

●KJ法を使用したグループ作業

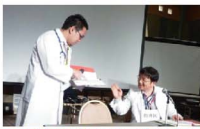

●「やさしいだけの指導医」を演じる様子

次回、第6回名大ネットワーク指導医講習会/第11回MMC指導医講習会(3月豊橋会場)は39名参加、ホテル日航豊橋で3月12日(金)～14日(日)に開催する。

## 第1回MMC実行委員会

昨年のMMC理事会において、今後のMMCの運営体制として約10名から構成される実行委員による合議にてMMC活動の企画・立案・実行を行うことが決定されたことを受け、去る1月26日(火)三重大学医学部小会議室にて、第1回MMC実行委員会が開催された。経緯や委員紹介、直近の事業に関する現状報告を相談し、初回から2時間及以上話し合いが行われた。第2回は2月23日(火)に開催する。

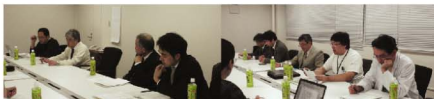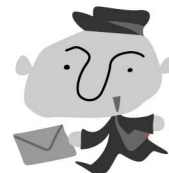

## ■三重県研修病院合同説明会 開催 (第二報)

参加無料・申込不要・入退場フリー

日時 平成22年3月28日(日) 13時～16時  
会場 メッセウイング・みえ 三重県津市北河路町19-1(伊勢道 津1C 約5分)

主催 NPO法人MMC卒後臨床研修センター・みえ医師バンク  
共催 三重県・三重県医師会  
後援 (財)三重県産業支援センター

●各病院による初期研修募集説明・専門医研修内容説明、初期研修を終えられた方の医師就職案内など、MMCと各病院による相談会です。医学生や研修医の皆様、専門医研修や医師就職希望者のたくさんのご参加をお待ちしています。

## ■第2回 研修医Advanced OSCE大会(第7回MMCAdvanced OSCE大会)

日時 平成22年3月20日(土)～21日(日) (1泊2日)  
会場 テルモメディカルプラネックス(神奈川県)

●研修医は北から順に岩手、神奈川、愛知、静岡、三重、奈良から48名が参加、加えて指導医は東京、埼玉、千葉、茨城、長野、岐阜、大阪、滋賀、徳島から約70名が参加する。  
東海北陸厚生局から後援もいただき、いよいよ来月開催する。

### 【趣旨および目的】

平成16年度から、基本的な診療能力の習得や人格の涵養を理念とした新医師臨床研修制度が導入され、その効果としての臨床能力の向上が目ざされている。今回地域や施設を越えた研修医、指導医によるAdvanced OSCE(医学生を対象とした本来のOSCE[Objective Structured Clinical Examination]よりもより高度で実践的な臨床能力試験)大会を実施し、臨床研修によって身につけた能力の評価を試みる。  
研修医は、地域や大学の枠組みを超えたAdvanced OSCEを経験することで自らの臨床研修病院にて研修中に身につけた臨床能力を確認し、他施設からの指導医より新しい視点でのフィードバックを受けることで今後の向上を図る。また他地域の研修医と指導医と交流することによって様々なロールモデルと出会う機会を得、今後のキャリア形成のリソースとする。指導医は、Advanced OSCEに参加し、評価を行うことにより、普段の自らの指導を振り返り、さらなる指導力の向上を目指す。また全国の指導医と、研修医を対象としたAdvanced OSCEの内容、評価について検討することにより、臨床研修修了時の評価基準の明確化、改善にも寄与する試みとなると考えられる。

## ■平成22年度新採用研修医オリエンテーション(速報)

日時 平成22年4月5日(月) ○講師:COML 辻本好子さん、  
会場 三重大学 三翠ホール 小ホール 聖路加国際病院 田中まゆみさん、ほか

## ■平成22年度 MMC輸液セミナー日程決定

- 第1回 水・電解質輸液と脱水 中南勢エリア 4月13日(火) 松阪フレックスホテル  
北勢エリア 4月20日(火) 四日市都ホテル
- 第2回 静脈栄養と 中南勢エリア 5月14日(金) 松阪フレックスホテル  
栄養プランニング 北勢エリア 5月20日(木) 四日市都ホテル
- 第3回 病態別輸液管理 中南勢エリア 5月26日(水) 松阪フレックスホテル  
-肝疾患・腎疾患の輸液管理- 北勢エリア 5月31日(月) 四日市都ホテル

入場無料 事前申込不要です。是非ご参加ください。★時間は全て19:30～21:00

## ■三重県の地域医療を考える ～平成21年度東海三県へき地医療研究会(2月6日)および地域医療再生シンポジウム「本音で語ろう、三重の地域医療」(2月11日)に参加して～

去る2月6日および11日、三重県の地域医療を考える絶好の機会に恵まれた。一県民としても非常に関心の高い会であったが、直面する課題に対してMMC事務局としてさらに活動を充実していきたいと改めて感じた。

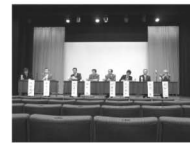

『本音で語ろう、三重の地域医療』

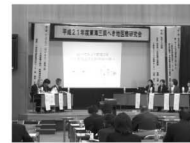

東海三県へき地医療研究会での「比べてみよう！東海3県～へき地医療の現状、医師確保対策～」シンポジウムの様子

ご感想・ご要望をぜひお聞かせください。

発行元 NPO法人MMC卒後臨床研修センター [担当 金見]  
〒514-8507 三重県津市江戸橋2-174 三重大学医学部附属病院10F西棟  
Tel 059-231-5429 Fax 059-231-5440  
URL <http://www.mmc-center.com>
